# Supplementary material for: Correction: Long-Term Low Carbohydrate Diet Leads to Deleterious Metabolic Manifestations in Diabetic Mice
Source: PubMed Central journal article supplement (PMC4868301; doi:10.1371/journal.pone.0155751), 2016-05-16

**Wild type-1(each n=3)**

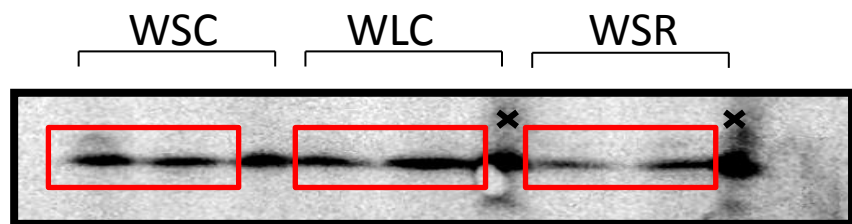

**Wild type-2(each n=3)**

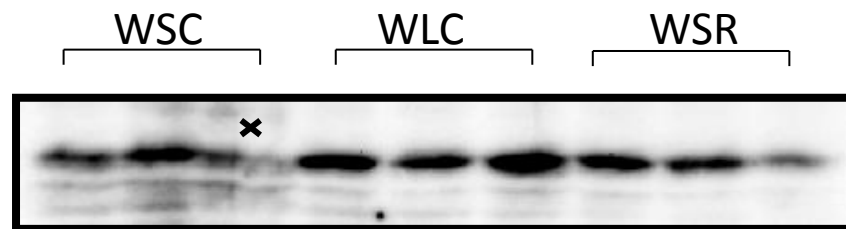

**STZ-1(each n=3)**

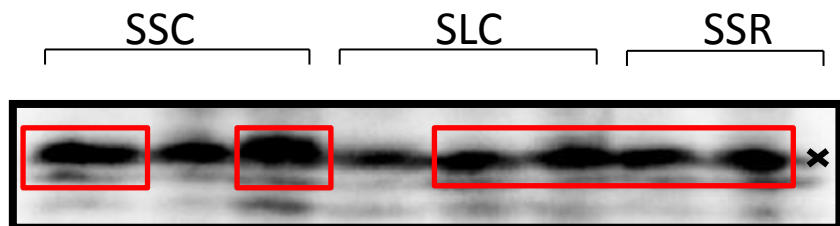

**STZ-2(each n=3)**

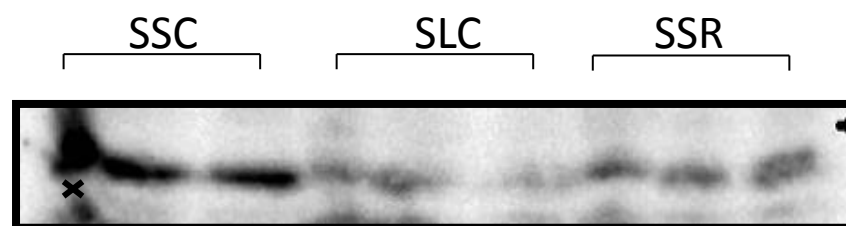

**KKAy-1(each n=3)**

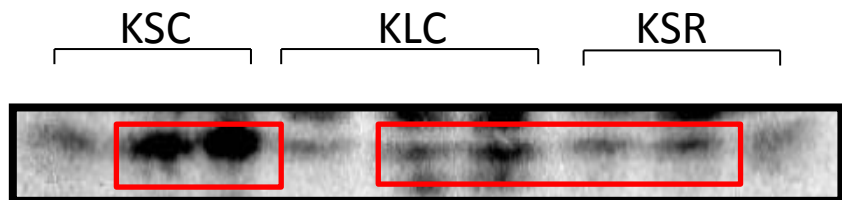

**KKAy-2(each n=3)**

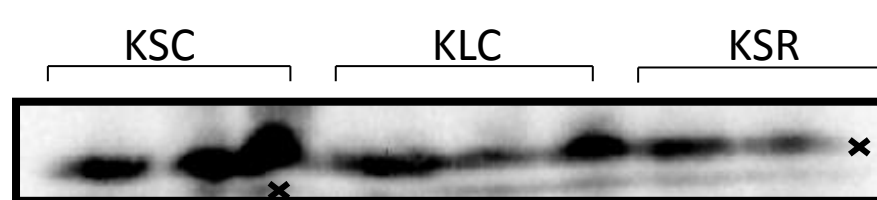

Supplement: pone.0155751.s001.pdf [file pone.0155751.s001.pdf]
